# Supplementary material
Source: PubMed Central journal article supplement (PMC5404968)
Supplement: NIHMS855372-supplement-2.pdf [file NIHMS855372-supplement-2.pdf]

## Supplementary Table 1

**Table 1. Experimental Groupings for the Glioma Tumor Study**

| <u>Group</u> | <u>Intracranial</u> | <u>Subcutaneous</u> | <u>Median Survival</u><br><u>(days)</u> | <u>p value</u> |
|--------------|---------------------|---------------------|-----------------------------------------|----------------|
| A            | PBS                 | PBS                 | 40                                      |                |
| B            | PBS                 | DC                  | 41                                      | 0.859          |
| C            | nMG                 | PBS                 | 46                                      | 0.086          |
| D            | nMG                 | DC                  | 205.5                                   | 0.008          |
| E            | iPS -MG             | DC                  | undefined                               | 0.001          |
